# Supplementary material
Source: PubMed Central journal article supplement (PMC9386786)

## **Supplemental Information**

### **Deadenylase-dependent mRNA decay of GDF15 and FGF21 orchestrates food intake and energy expenditure**

Sakie Katsumura, Nadeem Siddiqui, Michael Rock Goldsmith, Jaime H. Cheah, Teppei Fujikawa, Genki Minegishi, Atsushi Yamagata, Yukako Yabuki, Kaoru Kobayashi, Mikako Shirouzu, Takeshi Inagaki, Tim H.-M. Huang, Nicolas Musi, Ivan Topisirovic, Ola Larsson, Masahiro Morita

#### **Supplemental Information includes:**

Figures S1 to S7

Data S1

**Figure S1.****A**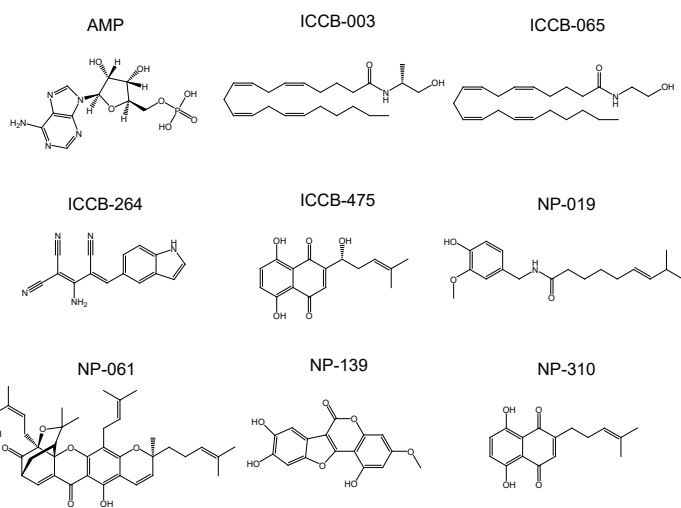**B**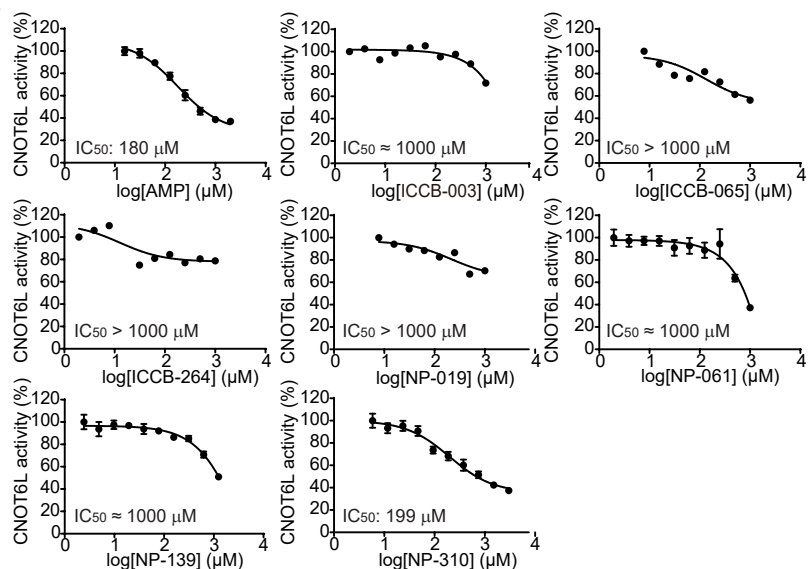**C**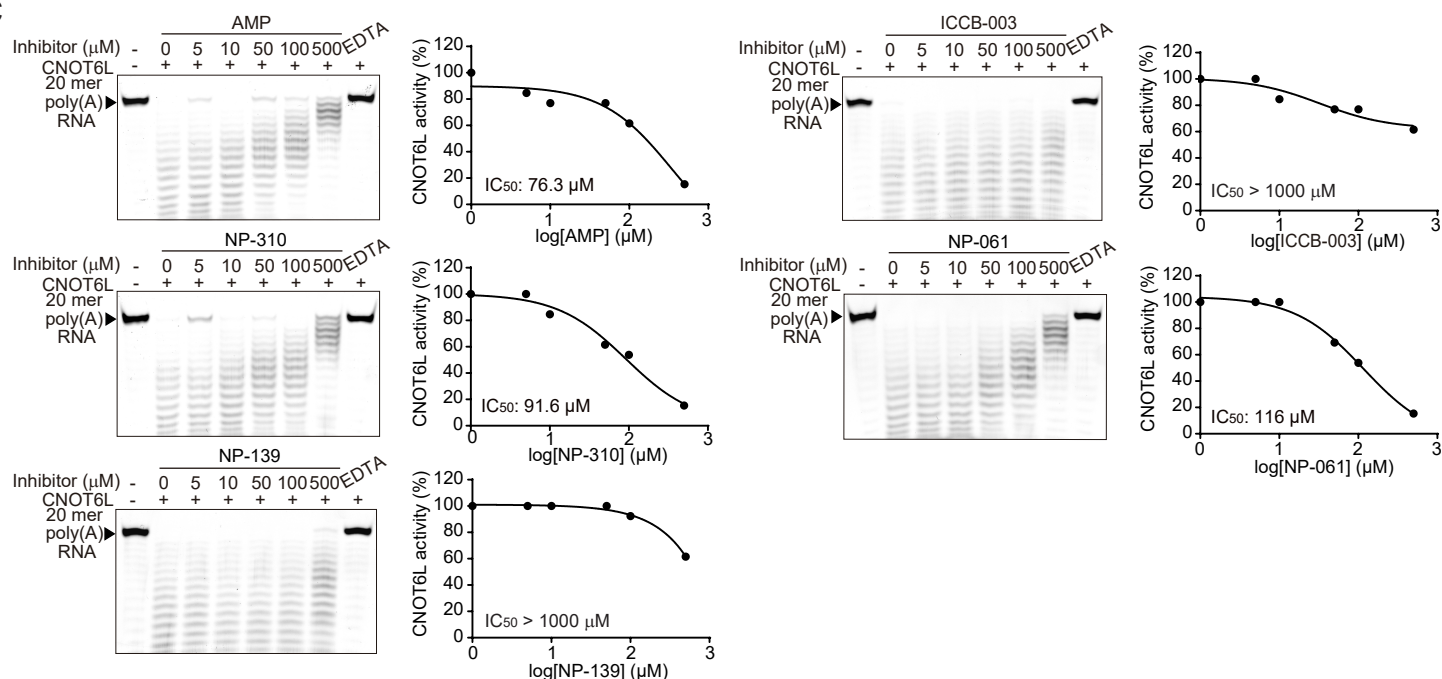**D**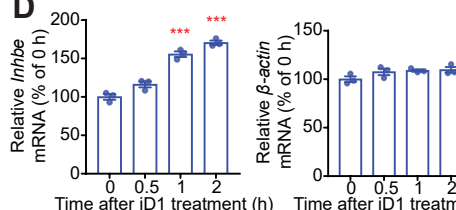**E**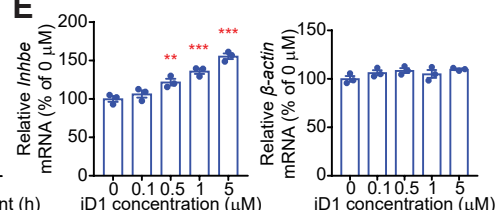**F**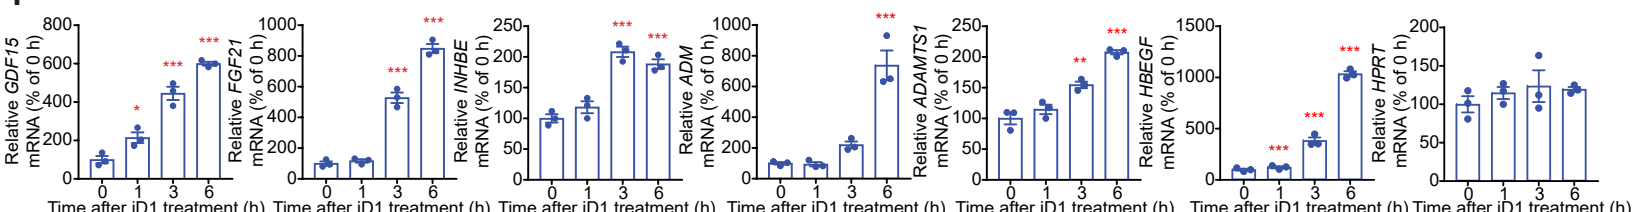**G**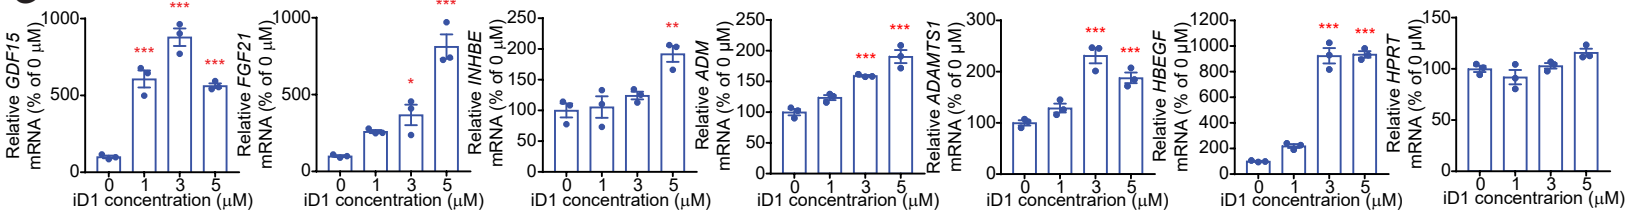

**Figure S1. Screening of CNOT6L inhibitors. Related to Figures 1 and 2.**

**(A)** Structures of AMP and the compounds identified in FRET-based HTS.

**(B)** Dose-dependent inhibition curves of CNOT6L activity with the indicated compounds. FRET-based deadenylase assay of CNOT6L with AMP or the selected compound at the indicated concentration was performed. Fluorescence intensity was measured to calculate  $IC_{50}$  of the indicated compounds.

**(C)** Gel-based deadenylase assay of CNOT6L with AMP or the selected compounds. CNOT6L protein at 2.5  $\mu$ M and a compound at the indicated concentration were incubated with 5'-FITC-poly(A)<sub>20</sub> RNA. Labeled RNAs were then visualized on a denaturing sequencing gel (left). Dose-dependent inhibition curves of CNOT6L activity with the indicated compounds were calculated from the gel images (right). EDTA was used as a positive control.

**(D and E)** Levels of the indicated mRNAs in primary hepatocytes treated with iD1 for the indicated time **(D)** or at the indicated concentration **(E)**. mRNA levels were determined by qPCR and normalized to *Hprt* mRNA.  $n = 3$  per group.

**(F and G)** Levels of the indicated mRNAs in Huh7 cells treated with iD1 for the indicated time **(F)** or at the indicated concentration **(G)**. mRNAs levels were determined by qPCR and normalized to *GAPDH* mRNA.  $n = 3$  per group.

Data represent mean  $\pm$  SEM. \* $p < 0.05$ , \*\* $p < 0.01$ , \*\*\* $p < 0.001$ ;  $p$  values by one-way ANOVA with Dunnett's multiple comparison test.

**Figure S2.**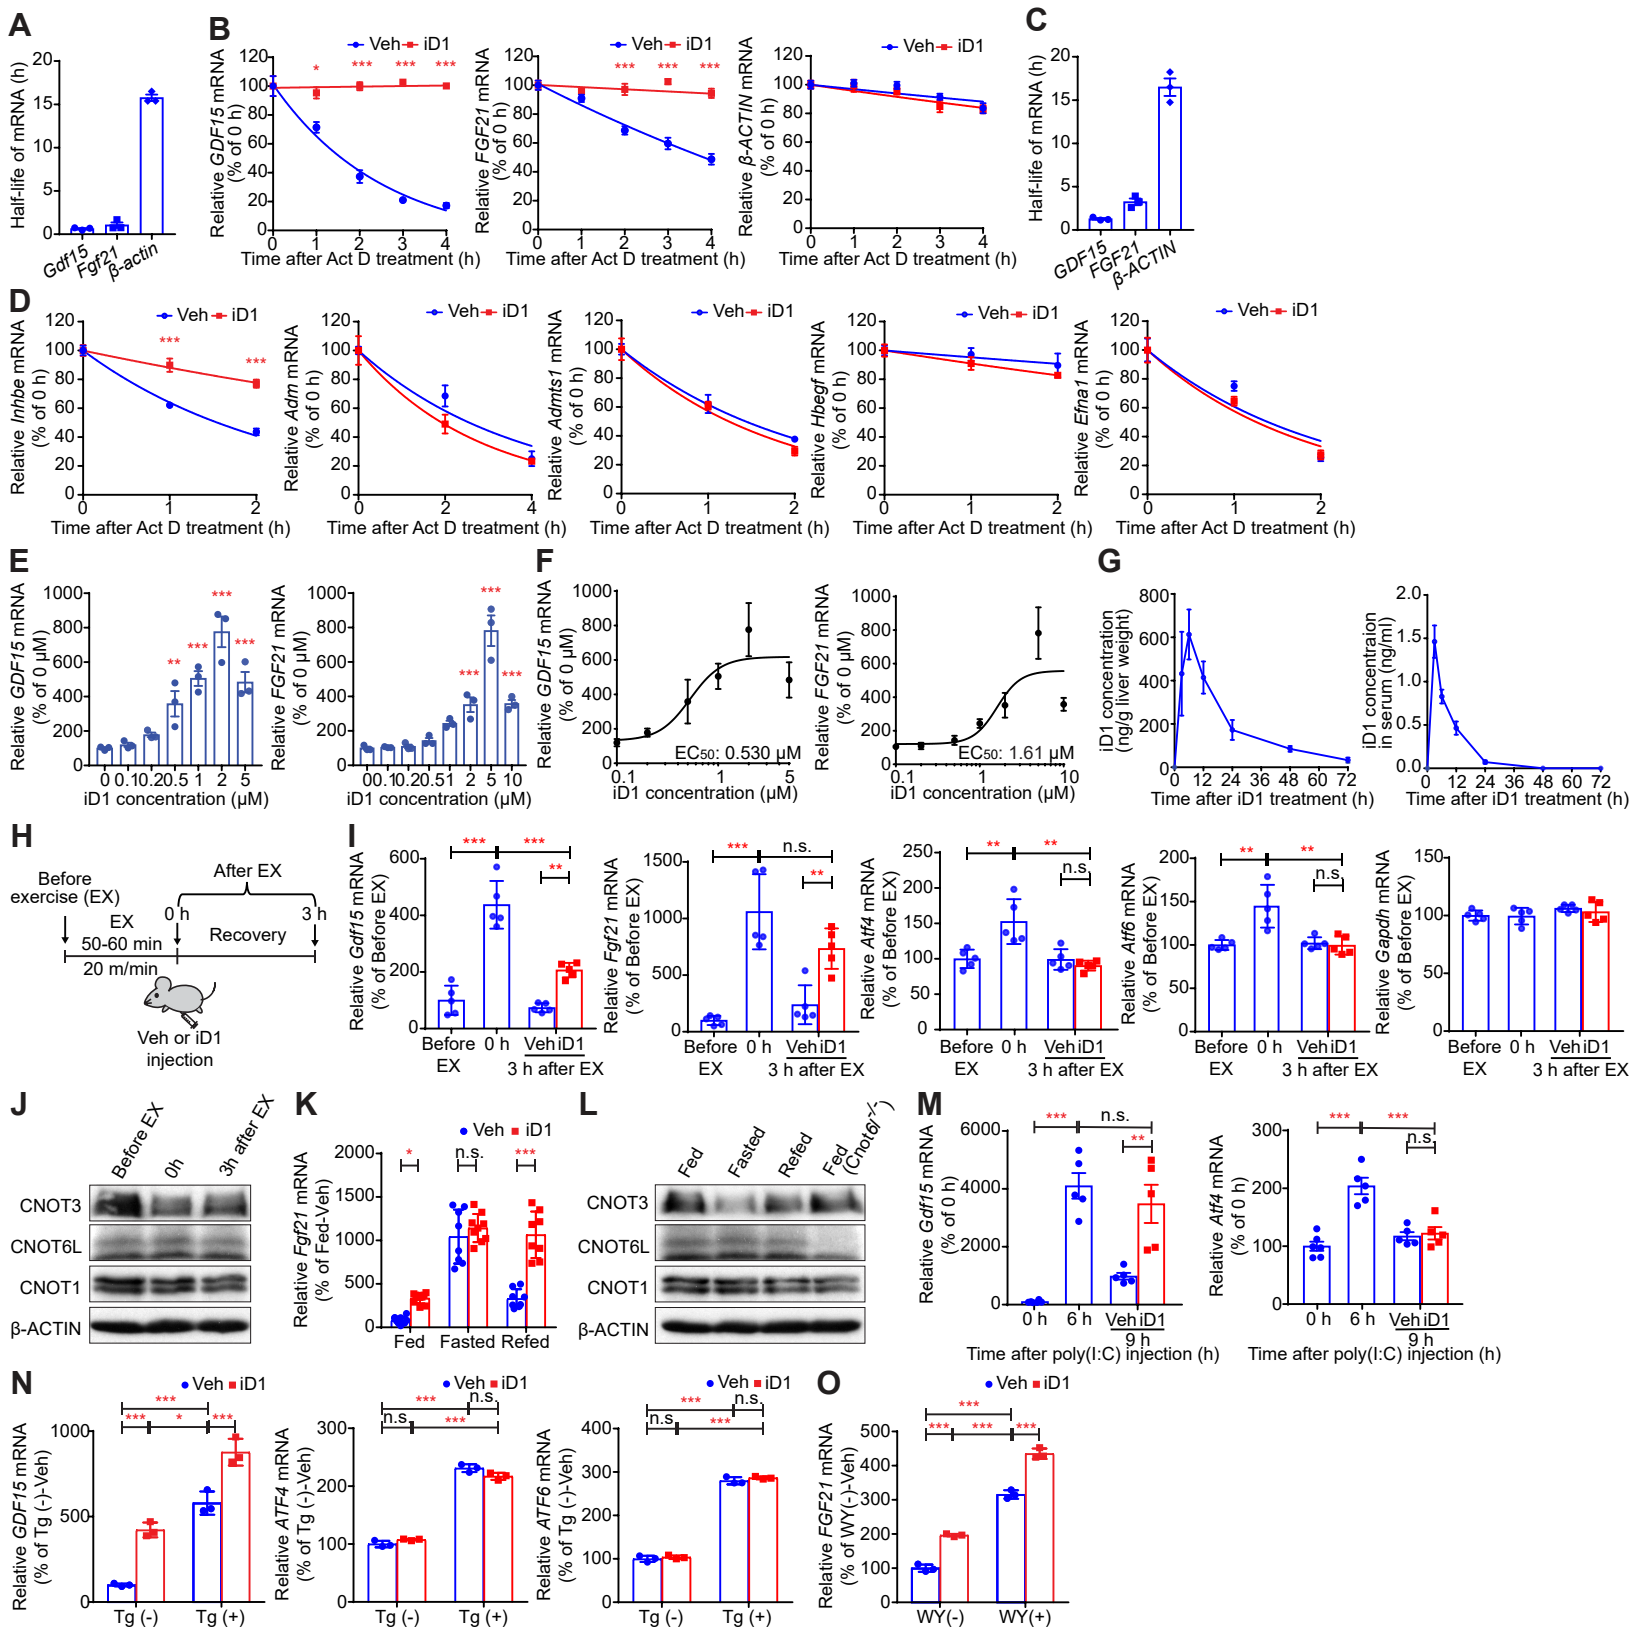

**Figure S2. CNOT6L inhibition increases levels of hepatokine mRNAs through their stabilization in cells and mice. Related to Figure 2.**

**(A)** Half-life of the indicated mRNAs in primary hepatocytes calculated from **(Figure 2C)**.  $n = 3$  per group.

**(B and C)** Stability of the indicated mRNAs in Huh7 cells incubated with actinomycin D (Act D) and iD1 for the indicated time. mRNA levels were determined by qPCR and normalized to *GAPDH* mRNA **(B)**. Half-life of the indicated mRNAs in Huh7 cells **(C)**.  $n = 3$  per group.

**(D)** Stability of the indicated mRNAs in primary hepatocytes incubated with Act D and iD1 for the indicated time. mRNA levels were determined by qPCR and normalized to *Hprt*.  $n = 3$  per group.

**(E and F)**  $EC_{50}$  of iD1 for *GDF15* and *FGF21* mRNA levels in Huh7 cells. Levels of the indicated mRNAs in Huh7 cells treated with iD1 at the indicated concentration were determined by qPCR and normalized to *GAPDH* mRNA **(E)**.  $EC_{50}$  for the indicated mRNAs were calculated **(F)**.  $n = 3$  per group.

**(G)** Concentrations of iD1 in livers (left) and serum (right) of mice treated with iD1 for the indicated time. iD1 concentrations were determined by LC-MS/MS.  $n = 5$  per group.

**(H-J)** A treadmill exercise and recovery protocol **(H)** and levels of the indicated mRNAs **(I)** and the indicated proteins **(J)** in livers of WT mice before, immediately after (0 h), or 3 h after the high-intensity exercise (EX). Veh or iD1 was immediately injected after the exercise. mRNA levels were quantified by qPCR and normalized to *Hprt* mRNA.  $n = 5$  per group.  $\beta$ -ACTIN was used as a loading control.

**(K and L)** Levels of *Fgf21* mRNA (**K**) and the indicated proteins (**L**) in livers of WT mice fed, fasted for 24 h, or refed for 2 h after 24 h-fasting. mRNA levels were quantified by qPCR and normalized to *Hprt* mRNA.  $n = 5$  per group.  $\beta$ -ACTIN was used as a loading control.

**(M)** Levels of *Gdf15* and *Atf4* mRNAs in livers of WT mice before (0 h), 6 h after, or 9 h after injection of poly(I:C) (10 mg/kg of body weight). Veh or iD1 was injected 6 h after the poly(I:C) injection. mRNA levels were quantified by qPCR and normalized to *Hprt* mRNA.  $n = 5$  per group.

**(N)** Levels of the indicated mRNAs in Huh7 cells treated with an ER stress inducer, thapsigargin (Tg), and/or iD1. mRNA levels were determined by qPCR and normalized to *GAPDH* mRNA.  $n = 3$  per group.

**(O)** Levels of *FGF21* mRNA in Huh7 cells treated with a PPAR $\alpha$  agonist, WY-14643 (WY), and/or iD1. mRNA levels were determined by qPCR and normalized to *GAPDH* mRNA.  $n = 3$  per group.

Data represent mean  $\pm$  SEM. \* $p < 0.05$ , \*\* $p < 0.01$ , \*\*\* $p < 0.001$ ;  $p$  values by two-way ANOVA with Bonferroni's multiple comparison test for (**B, D, I, K, and M-O**) or one-way ANOVA with Dunnett's multiple comparison test for (**E**).

**Figure S3.**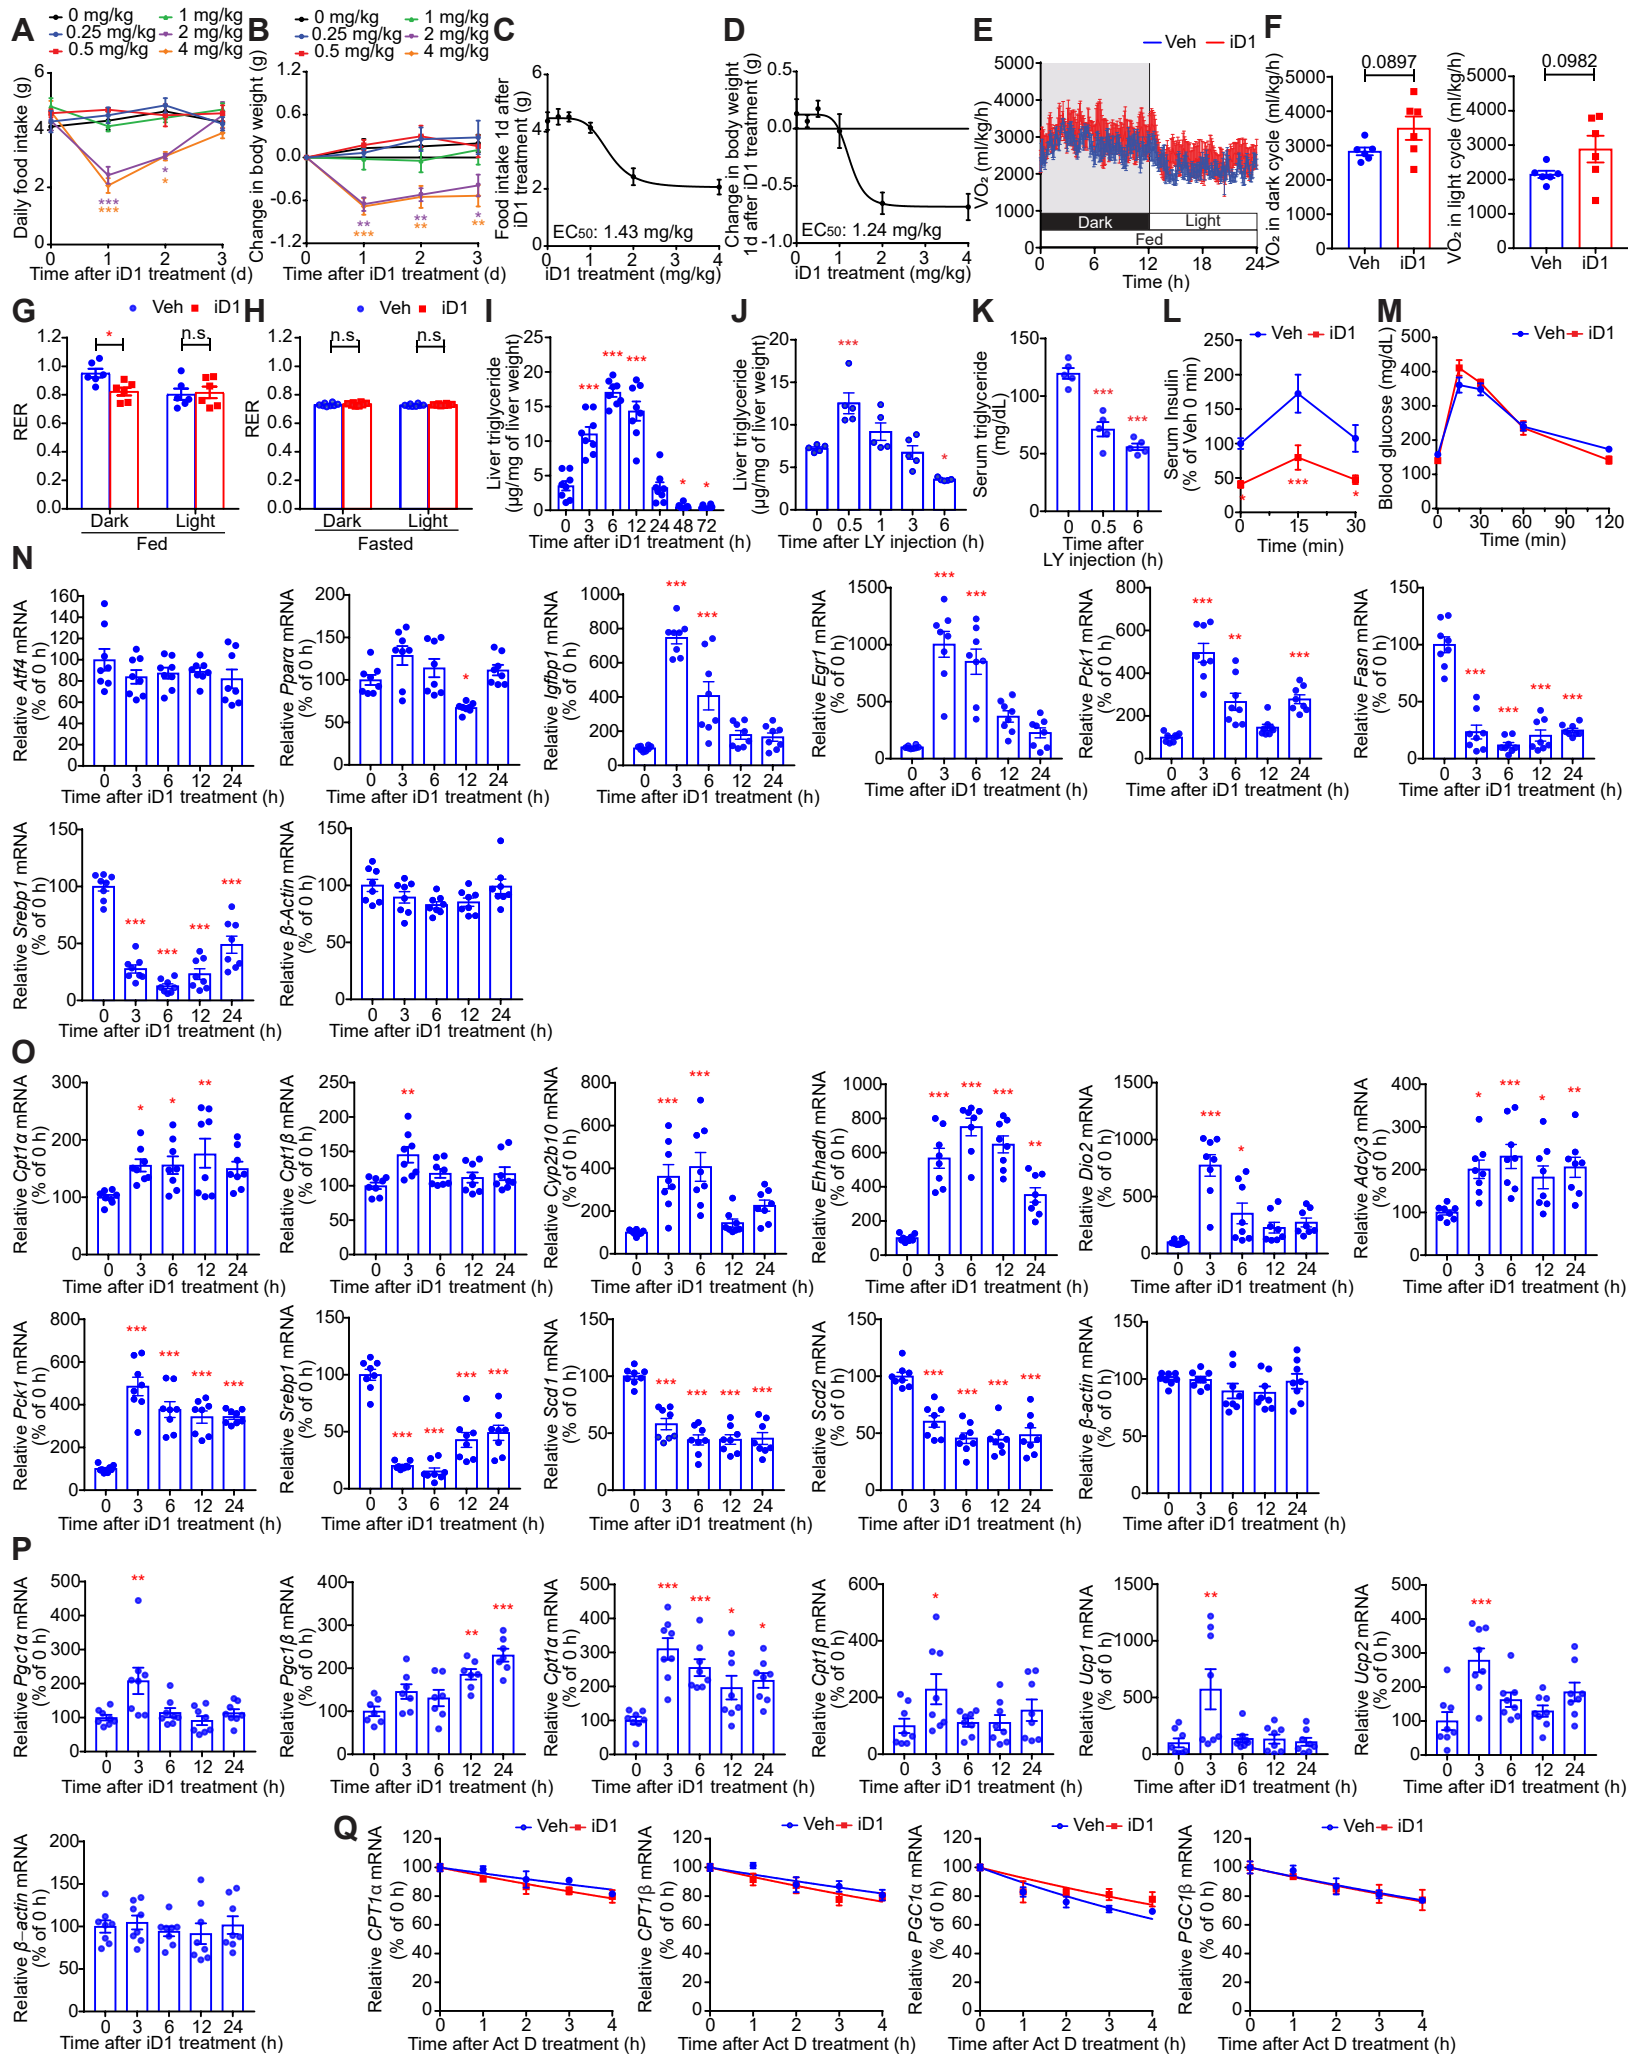

**Figure S3. CNOT6L inhibition decreases food intake and body weight and increases energy expenditure and fat utilization through up-regulation of hepatokine mRNAs. Related to Figure 3.**

**(A-D)** Daily food intake (**A**) and change in body weight (**B**) after a single administration of iD1 at the indicated concentration. EC<sub>50</sub> for daily food intake (**C**) and change in body weight (**D**) was calculated from (**A** and **B**). *n* = 5 per group.

**(E-G)** Oxygen consumption (VO<sub>2</sub>) for 24 h (**E**), average VO<sub>2</sub> of dark- or light-cycle (**F**), and average RER of dark- or light-cycle (**G**) after a single administration of Veh or iD1 into WT mice under a fed condition. VO<sub>2</sub> was normalized to body weight. *n* = 6 per group.

**(H)** Average RER of dark- or light-cycle after a single administration of Veh or iD1 into WT mice under a fasted condition. *n* = 7 per group.

**(I)** Levels of liver triglycerides in WT mice treated with iD1 for the indicated time. Liver triglyceride levels were normalized to liver weight. *n* = 8 per group.

**(J and K)** Levels of liver triglycerides (**J**) and serum triglycerides (**K**) in WT mice treated with an FGF21 analog, LY2405319 (LY), for the indicated time. Liver triglyceride levels were normalized to liver weight. *n* = 5 per group.

**(L and M)** Glucose tolerance tests (GTTs) in WT mice treated with Veh or iD1 for 3 h. Levels of serum insulin (**L**) and blood glucose (**M**) in glucose-injected WT mice for the indicated time under a fed condition. *n* = 7-8 per group.

**(N-P)** Levels of the indicated mRNAs in livers (**N**), BAT (**O**), and ingWAT (**P**) of WT mice administrated with iD1 for the indicated time. mRNA levels were quantified by qPCR and normalized to *Hprt* mRNA. *n* = 8 per group.



**(Q)** Stability of the indicated mRNAs in Huh7 cells incubated with Act D and iD1 for the indicated time. mRNA levels were determined by qPCR and normalized to *GAPDH* mRNA.  $n = 3$  per group. Data represent mean  $\pm$  SEM.  $*p < 0.05$ ,  $**p < 0.01$ ,  $***p < 0.001$ ;  $p$  values by two-way ANOVA with Bonferroni's multiple comparison test for **(A, B, G, H, L, M, and Q)**, one-way ANOVA with Dunnett's multiple comparison test for **(I-K and N-P)**, or student's t-test for **(F)**.

**Figure S4.**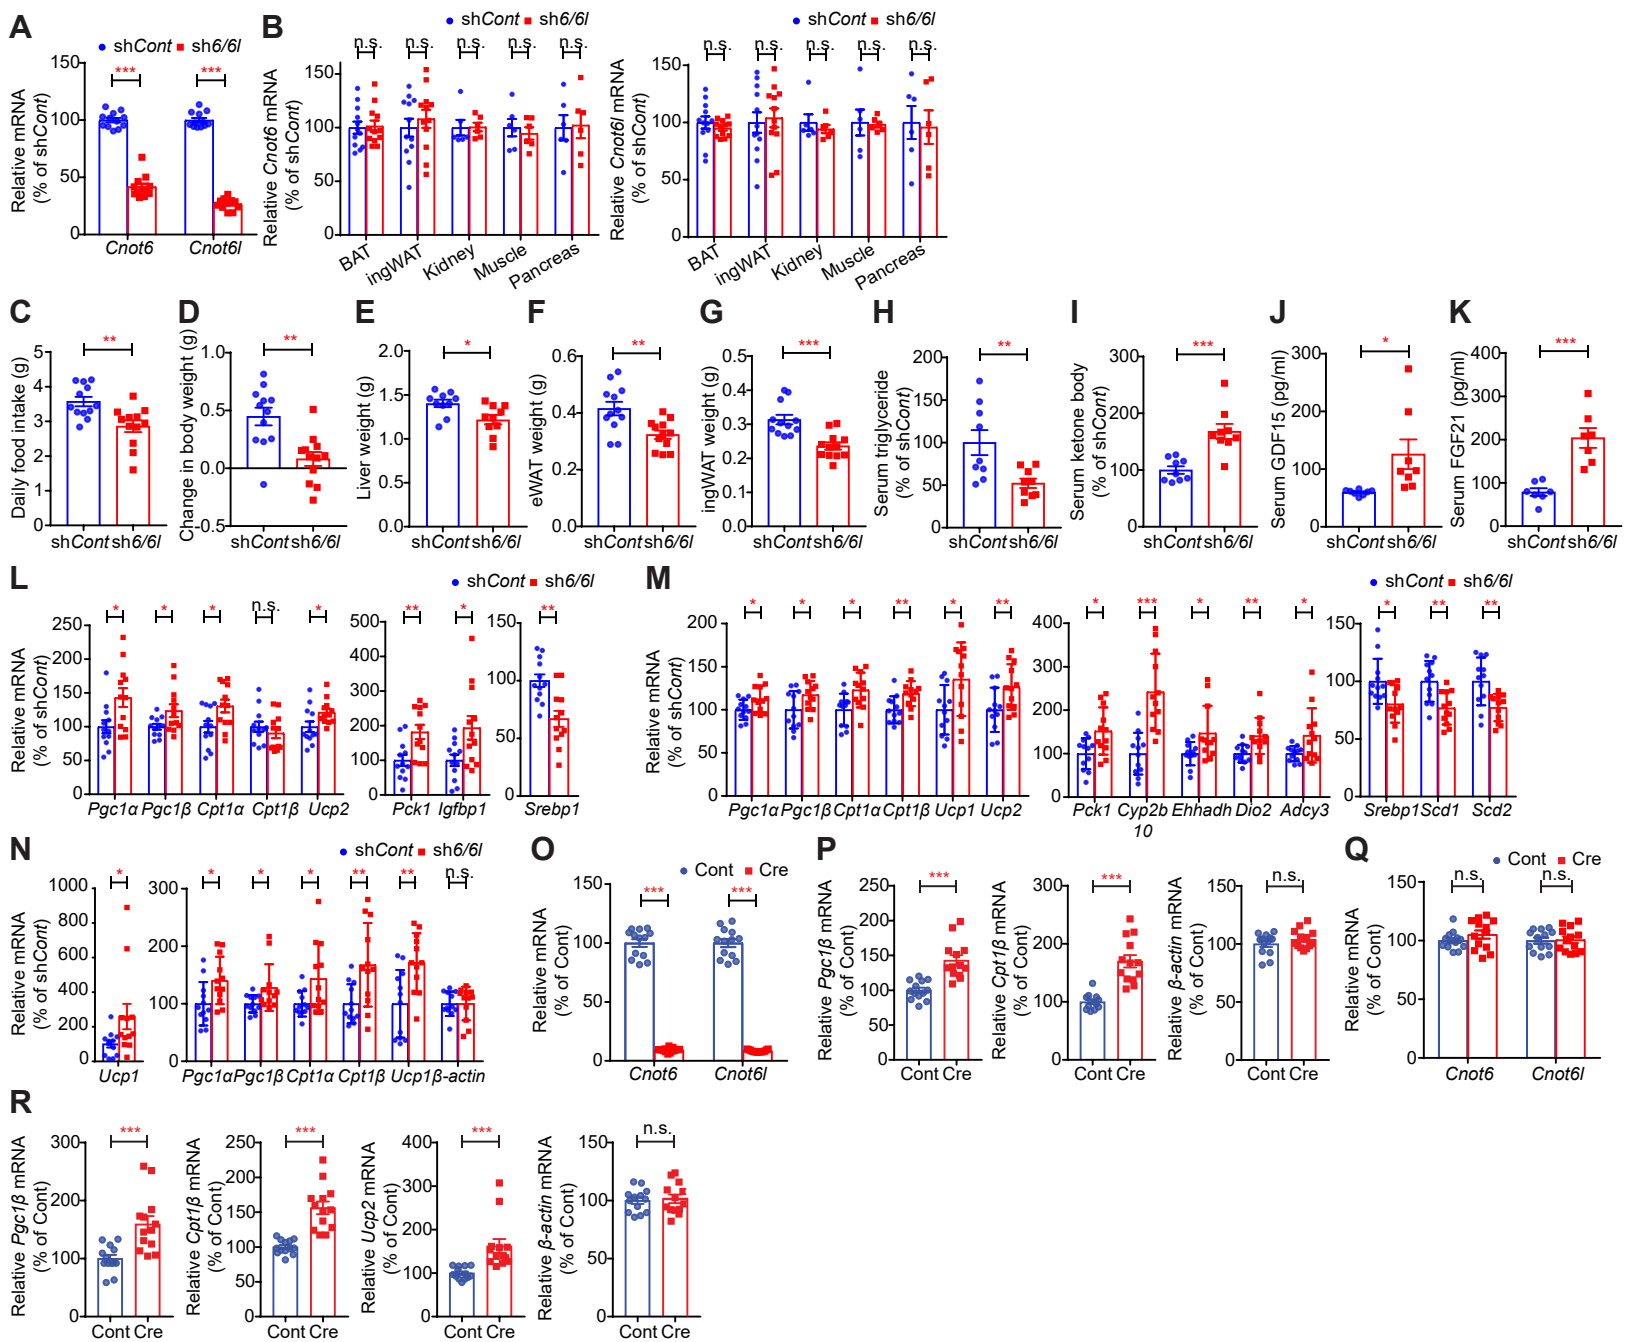

**Figure S4. Hepatic *Cnot6* and *Cnot6l* double knockdown/knockout induces loss of food intake and body weight and stimulates fat utilization through an increase in hepatokines.**

**Related to Figure 4.**

**(A and B)** Levels of *Cnot6* (left) and *Cnot6l* (right) mRNAs in livers **(A)** and the indicated tissues **(B)** of WT mice maintained with a standard diet (SD) and injected with adenovirus expressing shRNA against *Gfp* (shCont) or *Cnot6* and *Cnot6l* (sh6/6l). mRNA levels were normalized to *Hprt* mRNA.  $n = 12$  per group

**(C-G)** Daily food intake **(C)**, change in body weight **(D)**, and tissue weights of livers **(E)**, eWAT **(F)**, and ingWAT **(G)** of shCont and sh6/6l mice fed with SD.  $n = 10-12$  per group.

**(H-K)** Levels of serum triglycerides **(H)**, serum ketone bodies **(I)**, serum GDF15 **(J)**, and serum FGF21 **(K)** of shCont and sh6/6l mice fed with SD.  $n = 7-9$  per group.

**(L-N)** Levels of the indicated mRNAs in livers **(L)**, BAT **(M)**, and ingWAT **(N)** of shCont and sh6/6l mice. mRNA levels were normalized to *Hprt* mRNA.  $n = 12$  per group.

**(O-R)** Levels of the indicated mRNAs in livers **(O and P)** and BAT **(Q and R)** of *Cnot6/Cnot6l* conditional KO mice injected with AAV8 harboring mock (Cont) or Cre recombinase (Cre) under the liver-specific TBG promoter.  $n = 12$  per group.

Data represent mean  $\pm$  SEM. \* $p < 0.05$ , \*\* $p < 0.01$ , \*\*\* $p < 0.001$ ;  $p$  value by Student's  $t$ -tests.

**Figure S5.**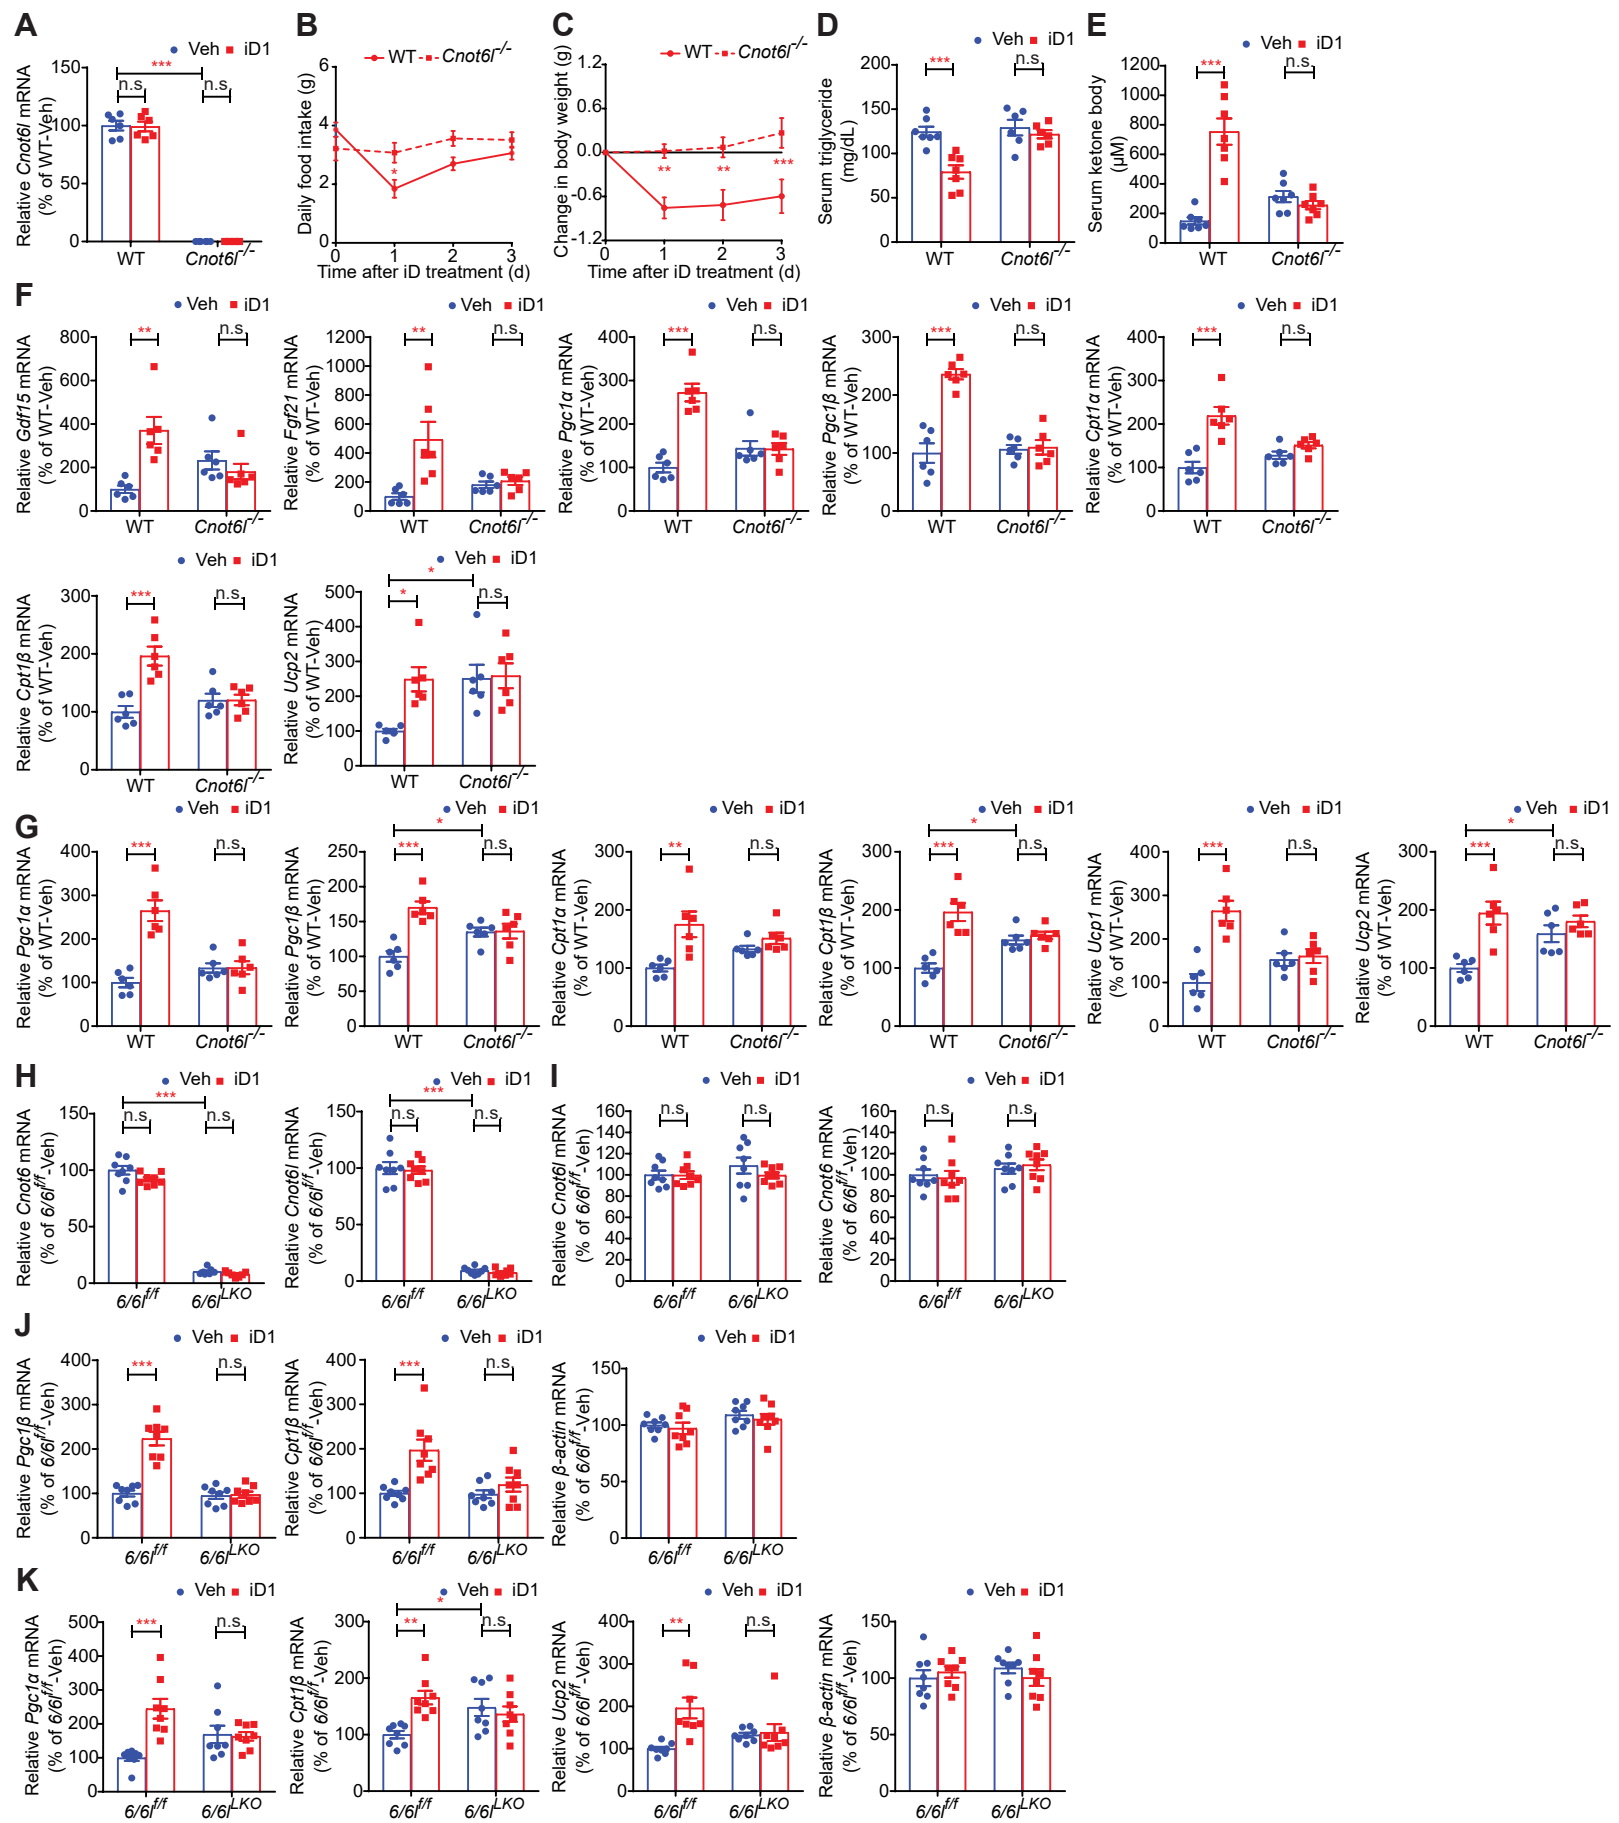

**Figure S5. Hepatic CNOT6 and CNOT6L are required for the iD1 actions on food intake, body weight, fat utilization, and hepatokine mRNAs. Related to Figure 4.**

**(A-G)** Levels of *Cnot6l* mRNA (**A**), daily food intake (**B**), change in body weight (**C**), and levels of serum triglycerides (**D**), serum ketone bodies (**E**), and the indicated mRNAs in livers (**F**) and BAT (**G**) of WT and *Cnot6l* knockout (*Cnot6l*<sup>-/-</sup>) mice after a single administration of Veh or iD1. mRNA levels were normalized to *Hprt* mRNA. *n* = 6-9 per group.

**(H-K)** Levels of *Cnot6* (left) and *Cnot6l* (right) mRNAs in livers (**H**) and BAT (**I**) and the indicated mRNAs in livers (**J**) and BAT (**K**) of control (*6/6*<sup>fl/fl</sup>) and *Cnot6/Cnot6l* liver-specific double KO (*6/6*<sup>L<sup>KO</sup></sup>) mice after a single administration of Veh or iD1. mRNA levels were normalized to *Hprt* mRNA. *n* = 8 per group.

Data represent mean ± SEM. \**p* < 0.05, \*\**p* < 0.01, \*\*\**p* < 0.001; *p* value by two-way ANOVA with Bonferroni's multiple comparison test.

**Figure S6.**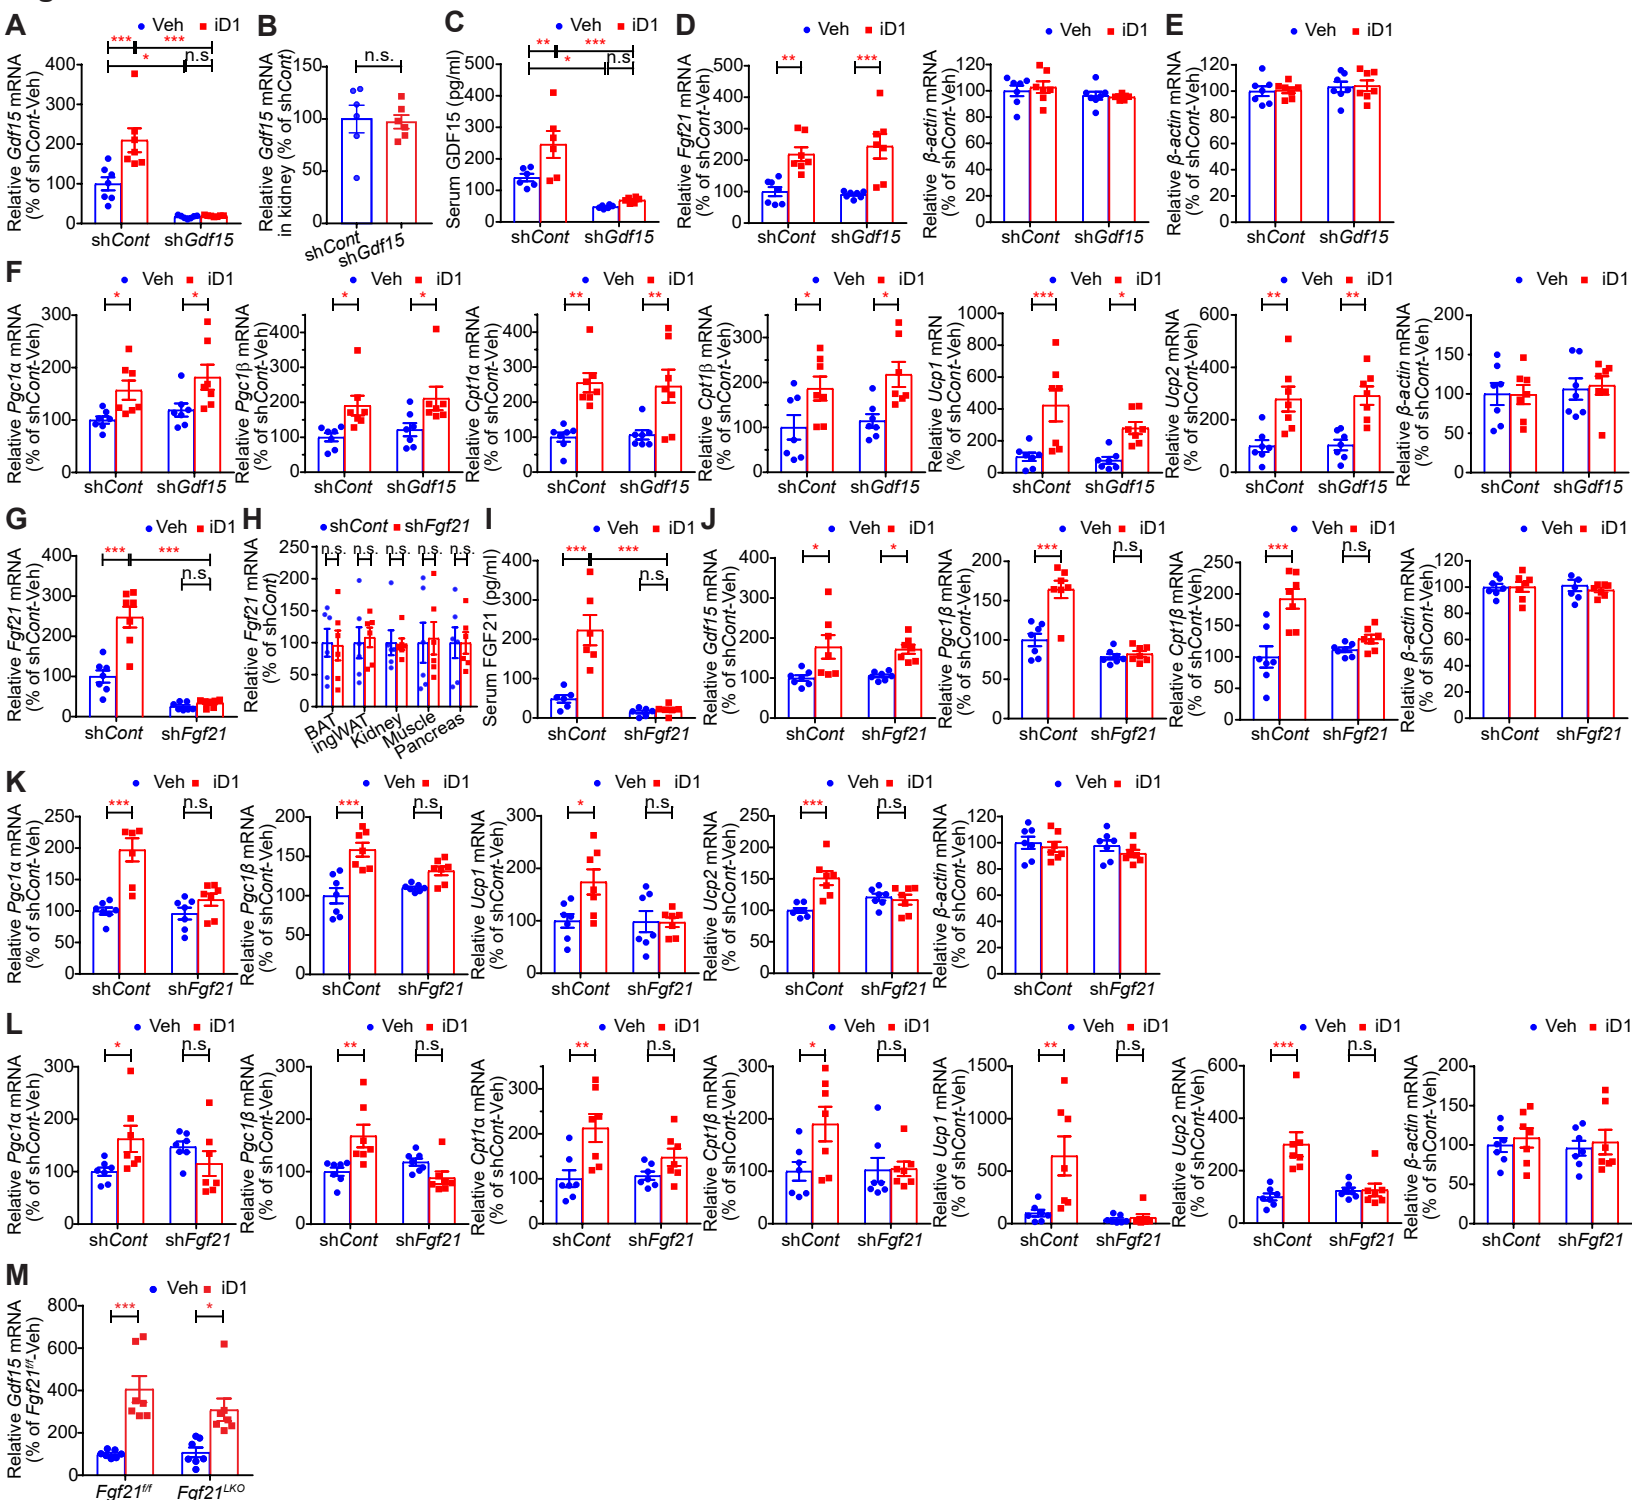

**Figure S6. GDF15 and FGF21 mainly mediate the effects of CNOT6L inhibition on food intake and energy and lipid consumption, respectively. Related to Figures 5 and 6.**

**(A-C)** Levels of *Gdf15* mRNA in livers (**A**) and BAT (**B**) and serum GDF15 (**C**) of WT mice injected with adenovirus expressing shRNA against *Gfp* (shCont) or *Gdf15* mRNA (sh*Gdf15*) after a single administration of Veh or iD1. mRNA levels were normalized to *Hprt* mRNA. *n* = 6-7 per group.

**(D-F)** Levels of the indicated mRNAs in livers (**D**), BAT (**E**), and ingWAT (**F**) of shCont and sh*Gdf15* mice after a single administration of Veh or iD1. mRNA levels were normalized to *Hprt* mRNA. *n* = 7 per group.

**(G-I)** Levels of *Fgf21* mRNA in livers (**G**) and the indicated tissues (**H**) and serum FGF21 (**I**) of WT mice injected with adenovirus expressing shRNA against *Gfp* (shCont) or *Fgf21* mRNA (sh*Fgf21*) mice after a single administration Veh or iD1. *n* = 6-7 per group.

**(J-L)** Levels of the indicated mRNAs in livers (**J**), BAT (**K**), and ingWAT (**L**) of shCont and sh*Fgf21* mice after a single administration of Veh or iD1. mRNA levels were normalized to *Hprt* mRNA. *n* = 7-8 per group.

**(M)** Levels of *Gdf15* mRNA in livers of control (*Fgf21*<sup>fl/fl</sup>) and *Fgf21* liver-specific KO (*Fgf21*<sup>LKO</sup>) mice after a single administration of Veh or iD1. mRNA levels were normalized to *Hprt* mRNA. *n* = 7 per group

Data represent mean ± SEM. \**p* < 0.05, \*\**p* < 0.01, \*\*\**p* < 0.001; *p* value by two-way ANOVA with Bonferroni's multiple comparison test for (**A**, **C-G**, and **I-M**) or Student's *t*-tests for (**B** and **H**).

**Figure S7.**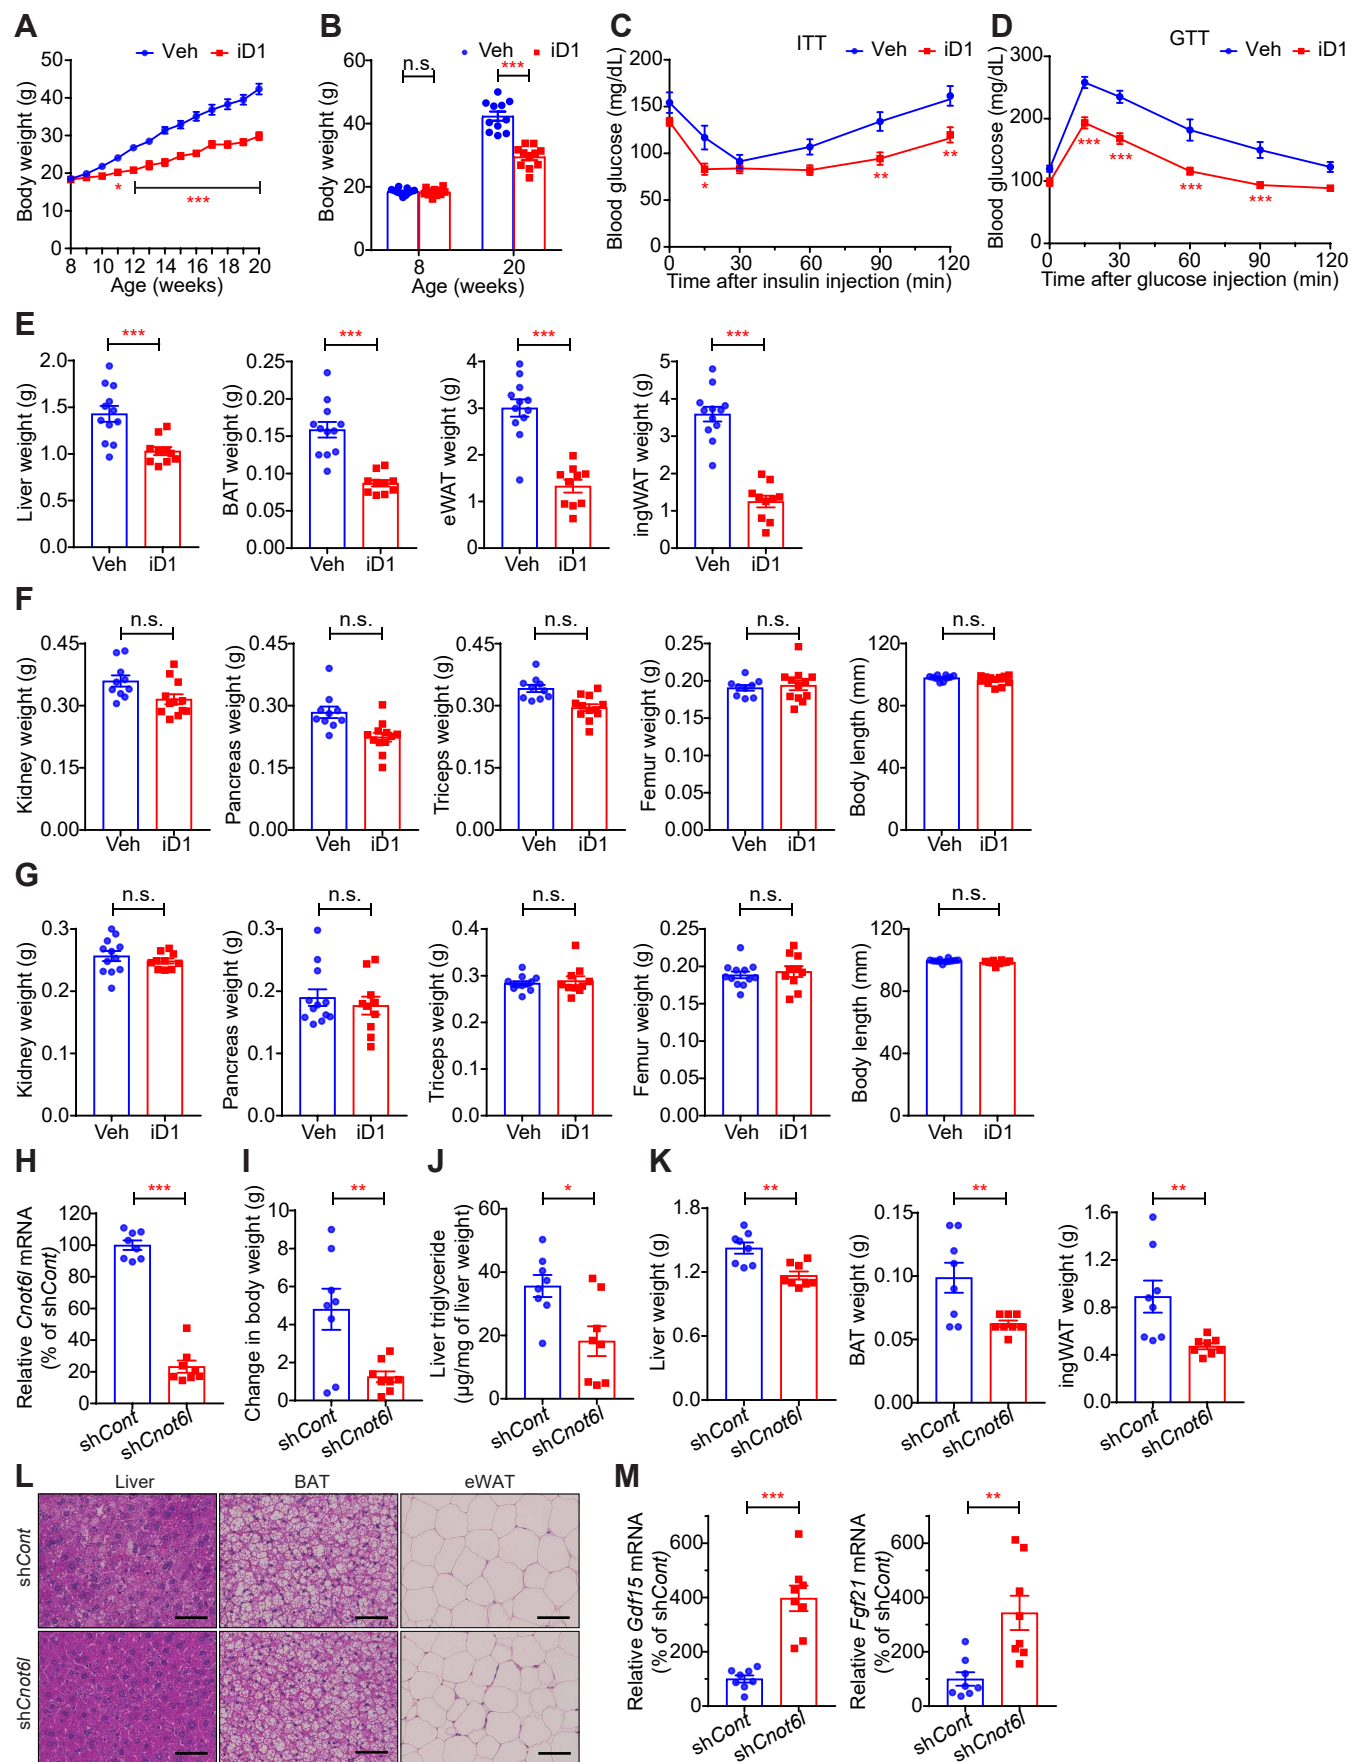



**Figure S7. CNOT6L inhibition ameliorates diet-induced metabolic disorders in male and female mice. Related to Figure 7.**

**(A and B)** Body weight curves for 12 weeks (**A**) and starting (8-week-old) and ending (20-week-old) body weight (**B**) of WT female mice fed with a high-fat diet (HFD) and treated with Veh or iD1 for 12 weeks. HFD feeding and iD1 treatment started at 8 weeks of age.  $n = 10-11$  per group.

**(C-E)** ITTs (**C**), GTTs (**D**), and weights of the indicated tissues (**E**) of 20-week-old WT female mice fed with HFD and treated with Veh or iD1 for 12 weeks.  $n = 9-12$  per group.

**(F and G)** Weights of the indicated tissues and body length of 20-week-old WT male (**F**) and female (**G**) mice fed with HFD and treated with Veh or iD1 for 12 weeks.  $n = 10-12$  per group.

**(H-M)** Levels of *Cnot6l* mRNA in livers (**H**), change in body weight (**I**), and liver triglycerides (**J**), weights of the indicated tissues (**K**), representative H&E staining images of the indicated tissues (**L**), and levels of the indicated hepatokine mRNAs (**M**) of WT mice injected with adenovirus expressing shRNA against *Gfp* (shCont) or *Cnot6l* mRNA (sh*Cnot6l*) and maintained with HFD for 2 weeks. mRNA levels were normalized to *Hprt* mRNA.  $n = 8$  per group. Scale bars represent 50  $\mu\text{m}$ .

Data represent mean  $\pm$  SEM.  $*p < 0.05$ ,  $**p < 0.01$ ,  $***p < 0.001$ ;  $p$  value by two-way ANOVA with Bonferroni's multiple comparison test for (**A-D**) or Student's  $t$ -tests for (**E-M**).



**Figure S2J**

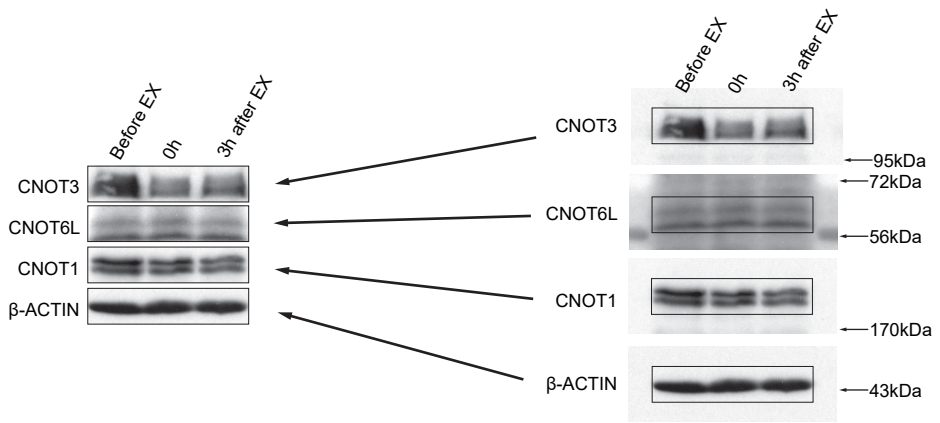

**Figure S2L**

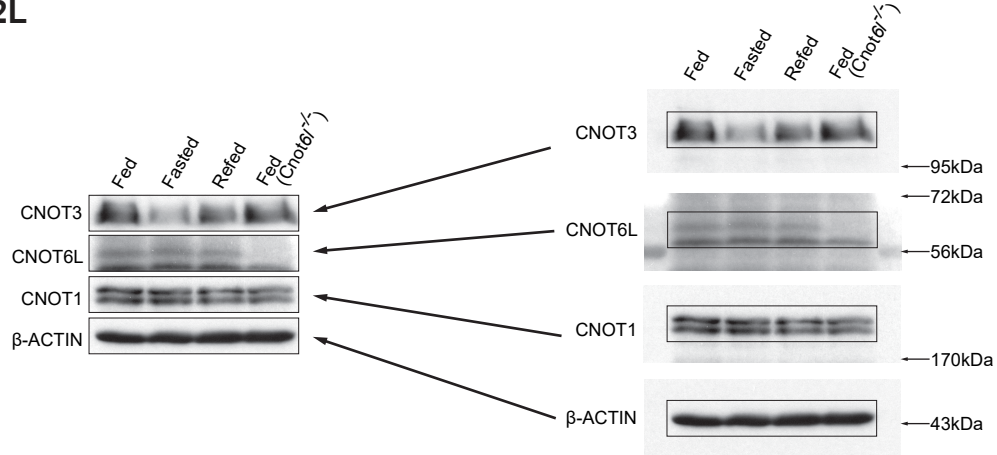

Supplement: NIHMS1795130-supplement-Supplementary_Information_with_Figures.pdf [file NIHMS1795130-supplement-Supplementary_Information_with_Figures.pdf]
